# Supplementary material
Source: bioRxiv or medRxiv preprint supplement (https://medrxiv.org/highwire/filestream/92448/field_highwire_adjunct_files/1/2020.08.07.20169862-2.pdf)
Supplement: Supplementary file [file 2020.08.07.20169862-2.pdf]

1 **Supplementary Information**

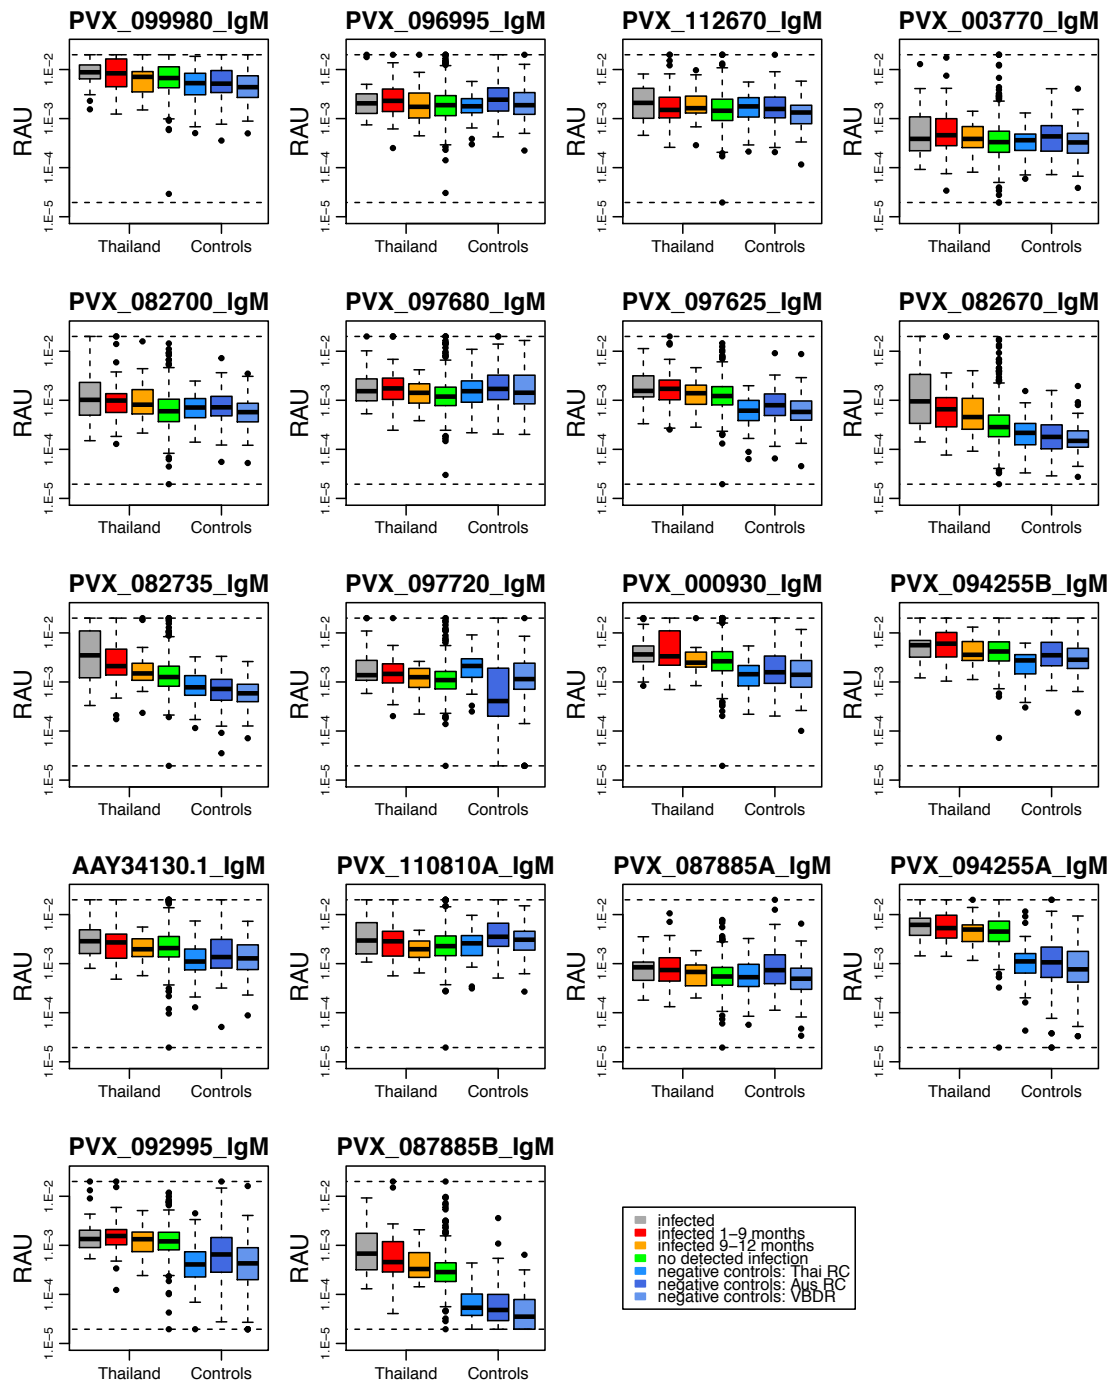

2

3 Figure S1: Measured IgM antibody response to 18 *P. vivax* proteins on the Luminex®  
 4 platform, stratified by geographical location (Thailand or controls) and time since last  
 5 PCR detected infection.

6

7

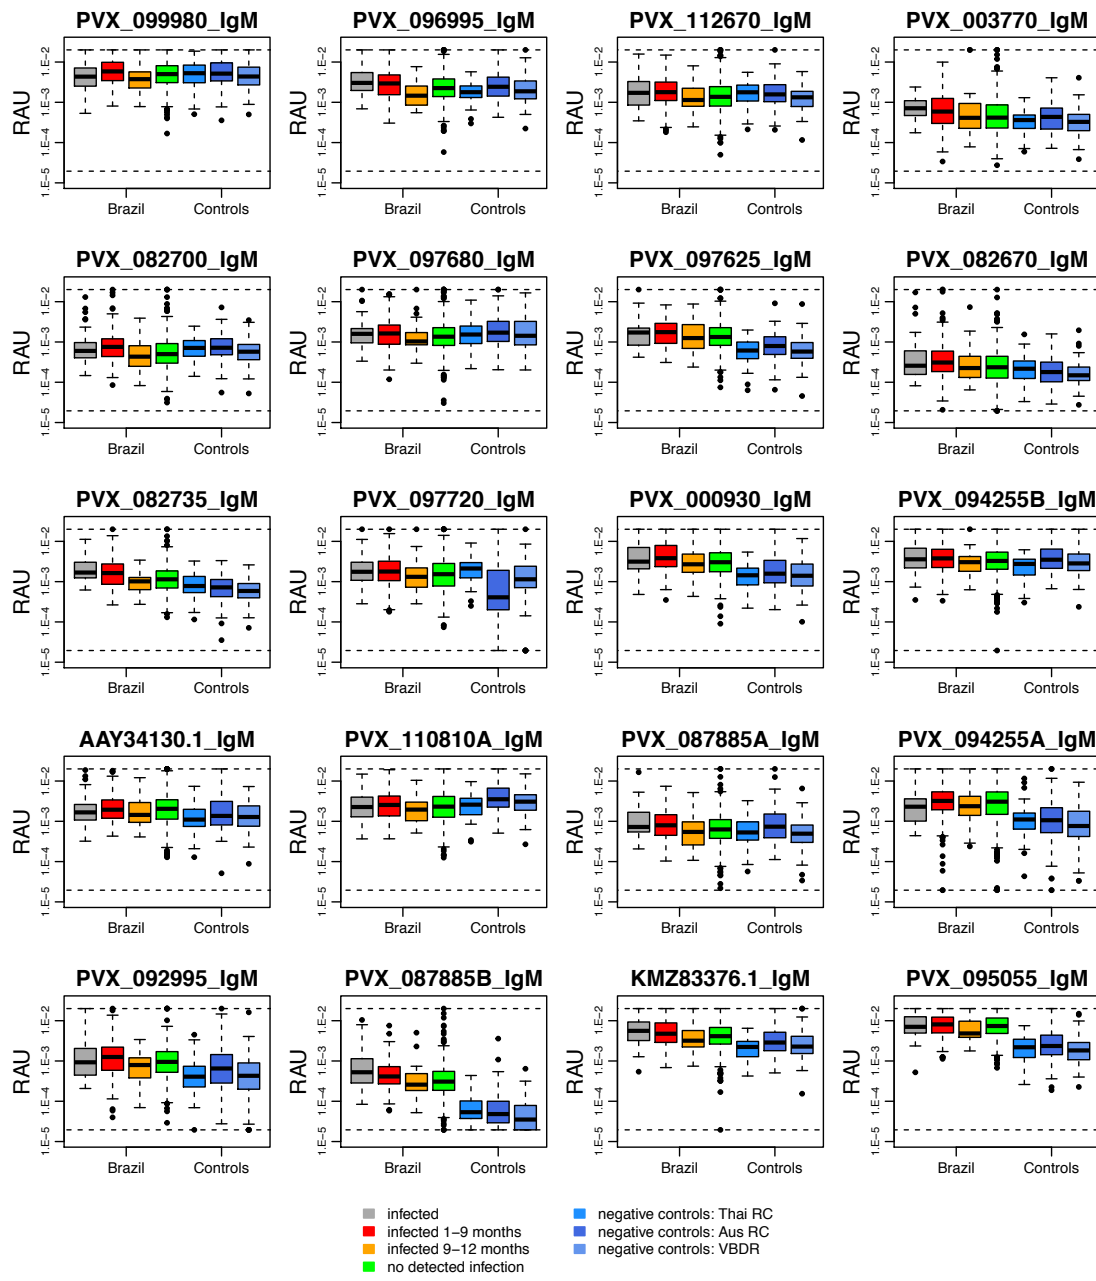

8

9 Figure S2: Measured IgM antibody response to 18 *P. vivax* proteins on the Luminex®  
 10 platform, stratified by geographical location (Brazil or controls) and time since last  
 11 PCR detected infection.
